# Supplementary material
Source: Springer Nature journal article supplement (https://www.springermedizin.de/resource/supplementary/12936_2012_2132_MOESM3_ESM.pdf/9542618)

PCR-unadjusted Kaplan-Meier Survival Curve  
without data correction

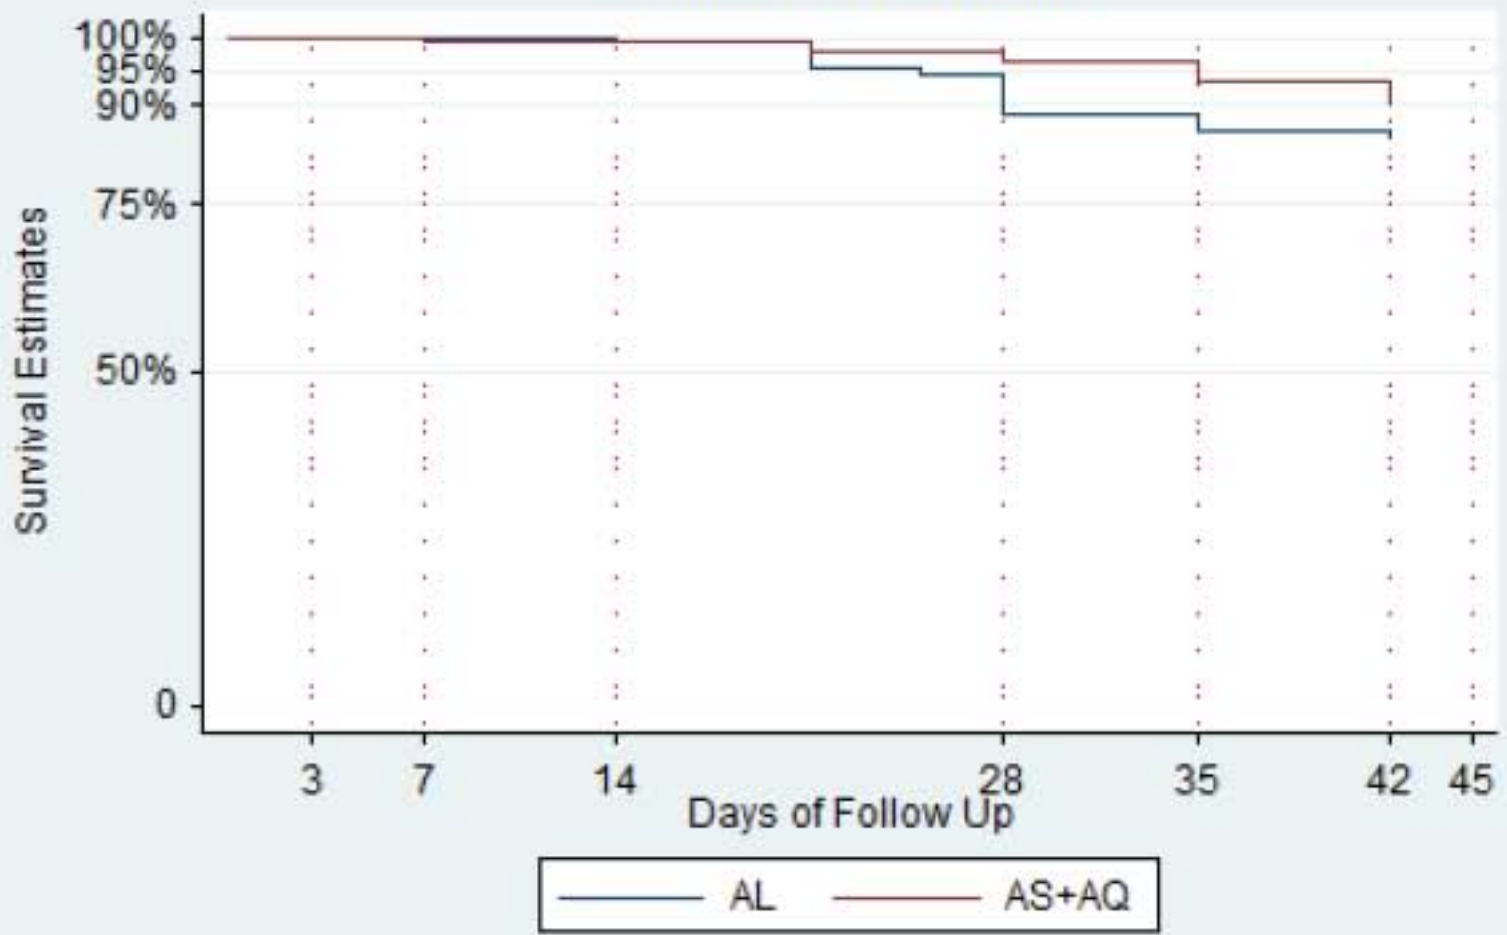

PCR-adjusted Kaplan-Meier Survival Curve  
without data correction

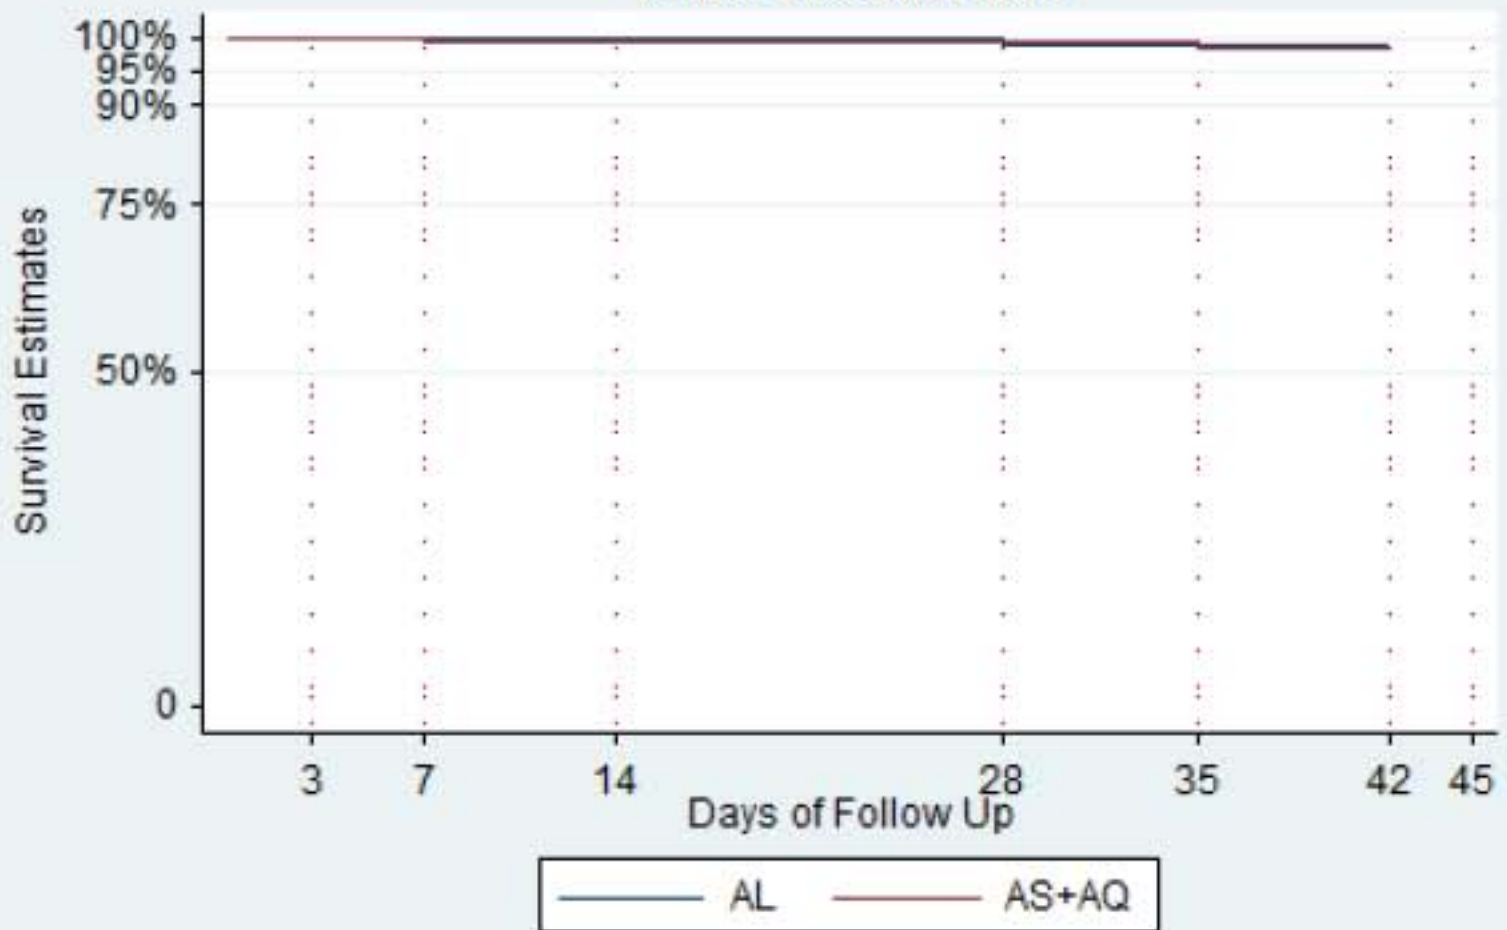

Supplement: MOESM3 [file 9542618]
